# Supplementary material for: Status, use and impact of sharing individual participant data from clinical trials: a scoping review
Source: PubMed Central journal article supplement — BMJ Open. 2021 Aug 18;11(8):e049228. doi: 10.1136/bmjopen-2021-049228 (PMC8375721; doi:10.1136/bmjopen-2021-049228), 2021-08-18
Supplement: bmjopen-2021-049228supp001.pdf [file bmjopen-2021-049228supp001.pdf]

## Supplementary material 1: Information sources

For commercial sponsors, we considered:

- 1/ Clinical Study Data Request (CSDR),
- 2/ the Yale University Open Data Access Project (YODA),
- 3/ the Supporting Open Access for Researchers initiative (SOAR),
- 4/ ViVli.

For non-commercial sponsor, we considered:

- 1/ the National Institute of Mental Health, National Database for Clinical Trials Related to Mental Illness (NIMH NDCT),
- 2/ The National Institute of Health, Biologic Specimen and Data Repositories Information Coordinating Center (NIH BioLINCC),
- 3/ B2Share,
- 4/ Dryad,
- 5/ the Data Repository for University of Minnesota (Drum),
- 6/ EASY,
- 7/ Edinburgh DataShare,
- 8/ FigShare,
- 9/ the Inter-university Consortium for Political and Social Research (ICPSR),
- 10/ the Swedish National data Service (SND),
- 11/ the University Medical Hospital Information Network (UMIN),
- 12/ Zenodo,
- 13/ the Early Breast Cancer Trialists' Collaborative Group (EBCTG),
- 14/ FreeBird,
- 15/ Traumatic Brain Injury – International Mission for Prognosis and Analysis of Clinical trials in TBI (TBI-IMPACT),
- 16/ Melanoma Molecular Map Project (MMMP),
- 17/ National institute of Diabetes and Digestive and Kidney Diseases (NIDDK),
- 18/ Immune Tolerance Network TrialShare (ITN Trialshare),
- 19/ Child Abuse,
- 20/ Pooled Resource Open Access Clinical trials database (ProAct).

For the different funders:

- 1/ National Institute of Health (NIH US),
- 2/ European Commission (EC Europe),
- 3/ Medical Research Council (MRC UK),
- 3/ Le programme hospitalier de recherche clinique (DGOS France),
- 4/ L'Agence nationale de la recherche (ANR France),
- 5/ Department of Defense (US DoD),
- 6/ Wellcome Trust UK,

- 7/ Canadian Institutes of Health Research (CIHR Canada),
- 8/ National Health and Medical Research Council (NHMRC Australia),
- 9/ Deutsche Forschungsgemeinschaft (DFG Germany),
- 10/ National Natural Science Foundation of China (NSFC China),
- 11/ National Institute of Health Research (NIHR UK),
- 12/ Gates Foundation US.

## Supplementary material 2: Literature searches

The initial algorithm for the literature search, detailed in the registered protocol ([osf.io/pb8cj](https://osf.io/pb8cj)), was updated on October 29th 2018 to include broader search terms.

| Name of Database                                 | Host, search interface               | Initial search<br>Search date 2018-10-29 |                            | Update search<br>Search date 2020-09-11<br>Publication year 2018-2020 |                                               |
|--------------------------------------------------|--------------------------------------|------------------------------------------|----------------------------|-----------------------------------------------------------------------|-----------------------------------------------|
|                                                  |                                      | Update status of the database            | Results                    | Update status of the database                                         | Results<br>Publication year<br>From 2018-2020 |
| Medline                                          | Wolters Kluwer / Ovid                | 1946 to October Week 3 2018              | 548                        | 1946 to September Week 1 2020                                         | 187                                           |
| Medline daily update                             |                                      | October 25, 2018                         |                            | September 09, 2020                                                    |                                               |
| MEDLINE In-Process & Other Non-Indexed Citations |                                      | 145                                      | 1946 to September 09, 2020 | 128                                                                   |                                               |
| MEDLINE Epub Ahead of Print                      |                                      |                                          | September 09, 2020         |                                                                       |                                               |
| Cochrane Library: Cochrane Reviews               | Wiley                                | Issue 10 of 12, October 2018             | 19                         | Issue 9 of 12, September 2020                                         | 12                                            |
| Cochrane Protocols                               |                                      |                                          | 1                          |                                                                       | 0                                             |
| Cochrane Central Register of Controlled Trials   |                                      | Issue 9 of 12, September 2018            | 416                        | Issue 9 of 12, September 2020                                         | 268                                           |
| Science Citation Index                           | Clarivate Analytics / Web of Science | 1945–present (2018-10-26)                | 862                        | 2018–present (2020-09-10)                                             | 419                                           |
| Social Science Citation Index                    |                                      | 1956–present (2018-10-26)                |                            |                                                                       |                                               |

|                                                                                         |                          |             |  |             |
|-----------------------------------------------------------------------------------------|--------------------------|-------------|--|-------------|
| <b>Total with duplicates</b>                                                            |                          | <b>1991</b> |  | <b>1014</b> |
| <b>Total without duplicates</b>                                                         |                          | <b>1544</b> |  | <b>763</b>  |
| <b>New citations 2018-2020 without overlap from initial search</b>                      |                          |             |  | <b>597</b>  |
| <b>Total without overlap initial search and update search (see PRISMA flow diagram)</b> | <b>2141 (1544 + 597)</b> |             |  |             |

**MEDLINE Databases: Host: Wolters Kluwer, search interface: Ovid**

### 1. Indexed MEDLINE-citations:

Search Strategy:

| # | Searches                                  | Results Initial search                                                                              | Results Update search                                                                                     | Annotations                      |
|---|-------------------------------------------|-----------------------------------------------------------------------------------------------------|-----------------------------------------------------------------------------------------------------------|----------------------------------|
|   |                                           | Search date: 2018-10-29: MEDLINE 1946 to October Week 3 2018, MEDLINE Daily Update October 25, 2018 | Search date: 2020-09-11: MEDLINE 1946 to September Week 1 2020, MEDLINE (Daily Update September 09, 2020. |                                  |
| 1 | exp Access to Information/                | 6845                                                                                                | 7597                                                                                                      | Concept data sharing: MeSH terms |
| 2 | Information Dissemination/                | 14697                                                                                               | 16894                                                                                                     |                                  |
| 3 | exp *"Information Storage and Retrieval"/ | 52187                                                                                               | 58658                                                                                                     |                                  |
| 4 | data collection/                          | 87165                                                                                               | 89553                                                                                                     |                                  |
| 5 | datasets as topic/                        | 2259                                                                                                | 4417                                                                                                      |                                  |
| 6 | or/1-5                                    | 157717                                                                                              | 170739                                                                                                    |                                  |
| 7 | exp clinical trial/                       | 809623                                                                                              | 868410                                                                                                    | Concept clinical trials:         |

|    |                                                                                                                                      |         |         |                                                                                                                     |
|----|--------------------------------------------------------------------------------------------------------------------------------------|---------|---------|---------------------------------------------------------------------------------------------------------------------|
| 8  | exp clinical trial as topic/                                                                                                         | 318580  | 345552  | MeSH terms or textwords                                                                                             |
| 9  | (randomi#ed or randomly or randomi#ation or ((random* or clinical) adj3 trial*)).ti,ab,kf.                                           | 879338  | 997736  |                                                                                                                     |
| 10 | Meta-Analysis as Topic/                                                                                                              | 16485   | 18279   | Concept Meta-analysis: MeSH                                                                                         |
| 11 | meta-analysis/                                                                                                                       | 93492   | 119228  |                                                                                                                     |
| 12 | or/7-11                                                                                                                              | 1489253 | 1650537 | Concept Clinical Trials OR Meta-analysis                                                                            |
| 13 | 6 and 12                                                                                                                             | 10206   | 11264   | Combination of concepts: data sharing (MeSH only) AND (clinical trials OR meta-analysis)                            |
| 14 | (data adj6 (share* or sharing* or reuse* or reuse* or reusing or re-using)).ti,ab,kf.                                                | 7822    | 9921    | Concept data sharing: Textwords                                                                                     |
| 15 | 13 and 14                                                                                                                            | 325     | 422     | data sharing (MeSH terms) AND data sharing (textwords) AND (clinical trials OR meta-analysis):<br>1. interim result |
| 16 | ((individual* or patient* or participant*) adj6 data adj6 (share* or sharing* or reuse* or reuse* or reusing or re-using)).ti,ab,kf. | 756     | 993     | Concept sharing IPD (textwords)                                                                                     |
| 17 | (IPD adj6 (share* or sharing* or reuse* or reuse* or reusing or re-using)).ti,ab,kf.                                                 | 23      | 38      |                                                                                                                     |
| 18 | or/16-17                                                                                                                             | 772     | 1017    |                                                                                                                     |
| 19 | 12 and 18                                                                                                                            | 129     | 179     | (Clinical trials OR meta-analysis) AND textwords for sharing IPD:<br>2. interim result                              |
| 20 | (data adj1 (share* or sharing* or reuse* or reuse* or reusing or re-using)).ti,ab,kf.                                                | 3196    | 4262    | Concept data sharing textwords                                                                                      |

|    |                                                      |         |         |                                                                                                |
|----|------------------------------------------------------|---------|---------|------------------------------------------------------------------------------------------------|
| 21 | 12 and 20                                            | 393     | 539     | (Clinical trials OR meta-analysis) AND textwords data sharing:<br>3. interim result            |
| 22 | 15 or 19 or 21                                       | 557     | 738     | OR-combination of interim results                                                              |
| 23 | exp animals/ not humans/                             | 4508403 | 4732433 | Exclusion of animals only                                                                      |
| 24 | 22 not 23                                            | 552     | 732     |                                                                                                |
| 25 | limit 24 to (english or french or german or spanish) | 548     | 725     | Restriction to English, German, French, Spanish:<br>Final result for indexed Medline citations |
|    |                                                      |         | 187     | Update search:<br>limit 25 to yr="2018 - 2020"                                                 |

*Term/* = MeSH (Medical subject heading)

*Exp term/* = exploded Mesh (incl. narrower terms)

*Exp \*term/* = MeSH as major topic incl. narrower terms as major topic

Wildcards, Truncation:

# = replaces exact one character

\* = zero or any number of characters

*adjn* = terms within *n* words in any order

*ti,ab,kf* = textword search in title, abstract, keyword heading word (author keywords)

## 2. Non-Indexed MEDLINE-citations:

| # | Searches | Results Initial search<br>Search date:<br>2018-10-29:<br>MEDLINE In-Process & Other Non-Indexed | Results Update search<br>Search date:<br>2020-09-11:<br>MEDLINE Epub Ahead of Print September 09, 2020, MEDLINE | Annotations |
|---|----------|-------------------------------------------------------------------------------------------------|-----------------------------------------------------------------------------------------------------------------|-------------|
|   |          |                                                                                                 |                                                                                                                 |             |

|    |                                                                                                                                       | Citations October 25, 2018, MEDLINE Epub Ahead of Print October 25, 2018 | In-Process & Other Non-Indexed Citations 1946 to September 09, 2020 |                                                                                                    |
|----|---------------------------------------------------------------------------------------------------------------------------------------|--------------------------------------------------------------------------|---------------------------------------------------------------------|----------------------------------------------------------------------------------------------------|
| 1  | ((individual* or patient* or participant*) adj6 data adj6 (share* or sharing* or reuse* or re-use* or reusing or re-using)).ti,ab,kf. | 215                                                                      | 323                                                                 | Concept data sharing                                                                               |
| 2  | (IPD adj6 (share* or sharing* or reuse* or re-use* or reusing or re-using)).ti,ab,kf.                                                 | 3                                                                        | 7                                                                   |                                                                                                    |
| 3  | (data adj1 (share* or sharing* or reuse* or re-use* or reusing or re-using)).ti,ab,kf.                                                | 1122                                                                     | 1564                                                                |                                                                                                    |
| 4  | or/1-3                                                                                                                                | 1230                                                                     | 1727                                                                |                                                                                                    |
| 5  | exp clinical trial/                                                                                                                   | 401                                                                      | 521                                                                 | Concept clinical trials                                                                            |
| 6  | (randomi#ed or randomly or randomi#ation or ((random* or clinical) adj3 trial*)).ti,ab,kf.                                            | 138560                                                                   | 174420                                                              | Concept meta-analysis                                                                              |
| 7  | meta-analysis as topic/                                                                                                               | 1                                                                        | 0                                                                   |                                                                                                    |
| 8  | meta-analysis/                                                                                                                        | 34                                                                       | 99                                                                  |                                                                                                    |
| 9  | (meta-analy* or metaanaly*).ti,ab,kf.                                                                                                 | 27362                                                                    | 37834                                                               | Concept clinical trials OR meta-analysis                                                           |
| 10 | or/5-9                                                                                                                                | 156727                                                                   | 199473                                                              |                                                                                                    |
| 11 | 4 and 10                                                                                                                              | 146                                                                      | 191                                                                 | Concepts Data sharing AND (clinical trials OR meta-analysis)                                       |
| 12 | limit 11 to (english or french or german or spanish)                                                                                  | 145                                                                      | 191                                                                 | Restriction to English, French, German, Spanish:<br>Final result for non-indexed Medline citations |
|    |                                                                                                                                       |                                                                          | 128                                                                 | Update search:<br>limit 12 to yr="2018 - 2020"                                                     |

Term/ = MeSH (Medical subject heading)

Exp term/ = exploded Mesh (incl. narrower terms)

Wildcards, Truncation:

# = replaces exact one character

\* = zero or any number of characters

adjn = terms within *n* words in any order  
 ti,ab,kf = textword search in title, abstract, keyword heading word (author keywords)

#### Cochrane Library (Wiley):

- Cochrane Database of Systematic Reviews
- Cochrane Protocols
- Cochrane Central Register of Controlled Trials

| ID | Search                                                         | Annotations                                                                                   |
|----|----------------------------------------------------------------|-----------------------------------------------------------------------------------------------|
| #1 | ((data near share*) or (data near sharing*)):ti,ab,kw          | Concept data sharing: Textword search in title, abstract, keywords                            |
| #2 | (data next share*) or (data next sharing*)                     | Concept data sharing: Textword search in fulltext                                             |
| #3 | #1 or #2                                                       | Concept data sharing. 1. Interim result                                                       |
| #4 | ((patient* or participant*) near individual*):ti,ab,kw         | Concept Individual patient data sharing. 2. Interim result                                    |
| #5 | data:ti,ab,kw                                                  |                                                                                               |
| #6 | (share* or sharing*):ti,ab,kw                                  |                                                                                               |
| #7 | #4 and #5 and #6                                               |                                                                                               |
| #8 | (IPD near (share* or sharing*)):ti,ab,kw                       | Concept IPD sharing: 3. Interim result                                                        |
| #9 | #3 or #7 or #8 in Cochrane Reviews, Cochrane Protocols, Trials | OR-combination of interim results. Limit to Cochrane Reviews, Protocols, Trials: final result |

| Results            | Initial search<br>Search date 2018-10-29 | Update search<br>Publication Year 2018-2020<br>Search date 2020-09-11 |
|--------------------|------------------------------------------|-----------------------------------------------------------------------|
| Cochrane Reviews   | 19<br>Issue 10 of 12, October 2018       | 12<br>Issue 9 of 12, September 2020                                   |
| Cochrane Protocols | 1<br>Issue 10 of 12, October 2018        | 0<br>Issue 9 of 12, September 2020                                    |
| Trials             | 416<br>Issue 9 of 12, September 2018     | 268<br>Issue 9 of 12, September 2020                                  |

ti,ab,kw = title,abstract keywords

near = terms in any order (default: within 6 words)  
 next = phrase searching: terms next to each other in the given order  
 \* = truncation



Via Web of Science (Clarivate Analytics):

Databases:

- **Science Citation Index Expanded (SCI-EXPANDED)**: 1945-present

- **Social Sciences Citation Index (SSCI)**: 1956-present

| Set  | Query                                                                  | Results Initial search<br>Search date: 2018-10-29<br><b>Time span: all years</b><br>Data last updated:<br>2018-10-26 | Results update search<br>Search date: 2020-09-11<br><b>Timespan=2018-2020</b><br>Data last updated: 2020-09-10 | Annotations                                                     |
|------|------------------------------------------------------------------------|----------------------------------------------------------------------------------------------------------------------|----------------------------------------------------------------------------------------------------------------|-----------------------------------------------------------------|
| # 1  | ts=("data" near/3 share*) or ("data" near/3 sharing*)                  | <a href="#">12,398</a>                                                                                               | <a href="#">5,227</a>                                                                                          | Concept data sharing                                            |
| # 2  | ts=((patient* or participant*) near/3 individual*)                     | <a href="#">73,929</a>                                                                                               | <a href="#">17,281</a>                                                                                         | Concept Individual patient data sharing                         |
| # 3  | ts="data"                                                              | <a href="#">5,101,598</a>                                                                                            | <a href="#">1,087,419</a>                                                                                      |                                                                 |
| # 4  | ts=(share* or sharing*)                                                | <a href="#">456,989</a>                                                                                              | <a href="#">114,300</a>                                                                                        |                                                                 |
| # 5  | #4 AND #3 AND #2                                                       | <a href="#">714</a>                                                                                                  | <a href="#">336</a>                                                                                            |                                                                 |
| # 6  | ts=("IPD" near/6 (share* or sharing*))                                 | <a href="#">23</a>                                                                                                   | <a href="#">24</a>                                                                                             | Concept IPD sharing                                             |
| # 7  | #6 OR #5 OR #1                                                         | <a href="#">12,970</a>                                                                                               | <a href="#">5,478</a>                                                                                          | OR-combination of concepts                                      |
| # 8  | ts=(randomi?ed or "randomly" or randomi?ation)                         | <a href="#">1,044,391</a>                                                                                            | <a href="#">201,056</a>                                                                                        | Concept clinical trials                                         |
| # 9  | ts=((random* or "clinical") near/3 trial*)                             | <a href="#">773,198</a>                                                                                              | <a href="#">154,885</a>                                                                                        |                                                                 |
| # 10 | ts=("meta analy*" or metaanaly*)                                       | <a href="#">313,038</a>                                                                                              | <a href="#">105,276</a>                                                                                        | Concept meta-analysis                                           |
| # 11 | #10 or #9 OR #8                                                        | <a href="#">1,478,458</a>                                                                                            | <a href="#">323,705</a>                                                                                        | Concept clinical trials<br>OR meta-analysis                     |
| # 12 | #11 AND #7                                                             | <a href="#">1,022</a>                                                                                                | <a href="#">453</a>                                                                                            | Concepts Data sharing<br>AND (clinical trials OR meta-analysis) |
| # 13 | #11 AND #7<br><b>Refined by: DOCUMENT TYPES: ( ARTICLE OR REVIEW )</b> | <a href="#">862</a>                                                                                                  | <a href="#">419</a>                                                                                            | Restriction to Article or Review: final result                  |

ts = topic: Title, Abstract, Author Keywords, Keywords Plus®

near/n = terms in any order within n words

\* = truncation

? = wildcard for exact 1 character

### Supplementary material 3: Study characteristics

| Author                 | Year | Country   | Type of research | Detail if type of research=other | Type of shared material |
|------------------------|------|-----------|------------------|----------------------------------|-------------------------|
| Tudur-Smith C et al.   | 2014 | UK        | Survey           |                                  | IPD                     |
| Murugiah K et al.      | 2016 | US        | Survey           |                                  | IPD                     |
| Krleža-Jerić K et al.  | 2009 | Canada    | Survey           |                                  | IPD                     |
| Jones CW et al.        | 2016 | US        | Survey           |                                  | IPD                     |
| Mayo-Wilson E et al.   | 2015 | US        | Other            | Case study                       | IPD                     |
| Reidpath DD et al.     | 2001 | Australia | Experim.         |                                  | IPD                     |
| Chalmers I et al.      | 2013 | UK        | Other            | Case study                       | IPD                     |
| Bergeris A et al.      | 2018 | US        | Survey           |                                  | IPD                     |
| Tudur Smith C et al.   | 2017 | UK        | Other            | Case study                       | Broader                 |
| Vaduganathan M et al.  | 2018 | US        | Metrics          |                                  | IPD                     |
| Merson L et al.        | 2015 | Vietnam   | Qualitative      |                                  | IPD                     |
| Rowhani-Farid A et al. | 2016 | Australia | Survey           |                                  | IPD                     |
| Rathi V et al.         | 2012 | US        | Survey           |                                  | IPD                     |
| Ali J et al.           | 2015 | US        | Survey           |                                  | IPD                     |
| Hopkins C et al.       | 2016 | UK        | Survey           |                                  | IPD                     |
| Sydes M et al.         | 2015 | UK        | Metrics          | Case study                       | IPD                     |
| Polanin J et al.       | 2019 | US        | Experim.         |                                  | IPD                     |
| Villain B et al.       | 2015 | France    | Survey           |                                  | IPD                     |
| Asare A et al.         | 2016 | US        | Metrics          |                                  | IPD                     |
| Strom B et al.         | 2016 | US        | Other            | Metrics + survey                 | IPD                     |
| Mello M et al.         | 2005 | US        | Survey           |                                  | IPD                     |
| Rathi V et al.         | 2014 | US        | Survey           |                                  | IPD                     |
| Huser V et al.         | 2018 | US        | Metrics          |                                  | IPD                     |
| Chapman S et al.       | 2014 | UK        | Survey           |                                  | IPD                     |
| Griswold M et al.      | 2013 | US        | Survey           |                                  | Broader                 |

|                                  |      |           |             |                                |         |
|----------------------------------|------|-----------|-------------|--------------------------------|---------|
| <b>Cheah PY et al.</b>           | 2015 | Thailand  | Qualitative |                                | IPD     |
| <b>Hee SW et al.</b>             | 2016 | UK        | Other       | Case study                     | IPD     |
| <b>Geifman N et al.</b>          | 2015 | US        | Metrics     |                                | IPD     |
| <b>Strom B et al.</b>            | 2014 | US        | Metrics     |                                | IPD     |
| <b>Ross J et al.</b>             | 2016 | US        | Survey      |                                | IPD     |
| <b>Boutron I et al.</b>          | 2016 | France    | Survey      |                                | Broader |
| <b>Vidal-Infer A et al.</b>      | 2018 | Spain     | Survey      |                                | Broader |
| <b>Krumholz H et al.</b>         | 2016 | US        | Metrics     |                                | IPD     |
| <b>Tannenbaum S et al.</b>       | 2018 | US        | Survey      |                                | IPD     |
| <b>Ross J et al.</b>             | 2017 | US        | Metrics     |                                | IPD     |
| <b>Mello M et al.</b>            | 2018 | US        | Survey      |                                | IPD     |
| <b>Chickramane A et al.</b>      | 2017 | India     | Survey      |                                | IPD     |
| <b>Howe N et al.</b>             | 2018 | UK        | Qualitative |                                | IPD     |
| <b>Naudet F et al.</b>           | 2018 | US        | Survey      |                                | IPD     |
| <b>Yuanyuan J et al.</b>         | 2017 | China     | Survey      |                                | IPD     |
| <b>Spence O et al.</b>           | 2018 | US        | Survey      |                                | IPD     |
| <b>Polanin J et al.</b>          | 2018 | US        | Survey      |                                | IPD     |
| <b>Zhu C et al.</b>              | 2017 | US        | Metrics     |                                | IPD     |
| <b>So D et al.</b>               | 2017 | Canada    | Survey      |                                | IPD     |
| <b>Savage C et al.</b>           | 2009 | US        | Survey      |                                | IPD     |
| <b>Kawahara T et al.</b>         | 2018 | Japan     | Metrics     |                                | IPD     |
| <b>Goldacre B et al.</b>         | 2017 | UK        | Survey      |                                | IPD     |
| <b>Pisani E et al.</b>           | 2017 | UK        | Other       | Metrics + Qualitative research | IPD     |
| <b>Bertagnolli M et al.</b>      | 2017 | US        | Metrics     |                                | IPD     |
| <b>Coady S et al.</b>            | 2017 | US        | Metrics     |                                | IPD     |
| <b>Hopkins A et al.</b>          | 2018 | Australia | Survey      | Survey                         | IPD     |
| <b>Piwowar H et al.</b>          | 2007 | US        | Survey      |                                | IPD     |
| <b>Laine C et al.</b>            | 2009 | US        | Survey      |                                | Broader |
| <b>Shmueli-Blumberg D et al.</b> | 2013 | US        | Metrics     |                                | IPD     |
| <b>de Vito N et al.</b>          | 2018 | UK        | Survey      |                                | Broader |

|                                     |      |          |             |         |
|-------------------------------------|------|----------|-------------|---------|
| <b>Nevitt S et al.</b>              | 2017 | UK       | Survey      | IPD     |
| <b>Ahmed I et al.</b>               | 2011 | UK       | Survey      | IPD     |
| <b>Navar A et al.</b>               | 2016 | USA      | Metrics     | IPD     |
| <b>Ebrahim S et al.</b>             | 2014 | USA      | Survey      | IPD     |
| <b>Vassar M et al.</b>              | 2020 | USA      | Survey      | IPD     |
| <b>Cheah PY et al.</b>              | 2018 | Thailand | Qualitative | IPD     |
| <b>Staham EE et al.</b>             | 2020 | USA      | Survey      | Broader |
| <b>Nutu D et al.</b>                | 2019 | Romania  | Survey      | IPD     |
| <b>Aleixandre-Benavent R et al.</b> | 2019 | Spain    | Survey      | IPD     |
| <b>Ross JS et al.</b>               | 2018 | USA      | Metrics     | Broader |
| <b>Gorman DM et al.</b>             | 2019 | USA      | Survey      | IPD     |
| <b>Bosserdt M et al.</b>            | 2019 | Germany  | Survey      | IPD     |
| <b>Whitlock EP et al.</b>           | 2019 | USA      | Survey      | IPD     |
| <b>Gabelica M et al.</b>            | 2019 | Croatia  | Survey      | IPD     |
| <b>Gorman DM et al.</b>             | 2020 | USA      | Survey      | IPD     |
| <b>Kaufmann I et al.</b>            | 2019 | UK       | Survey      | IPD     |
| <b>Veroniki AA et al.</b>           | 2019 | Greece   | Experim.    | IPD     |
| <b>Godolphin PJ et al.</b>          | 2019 | UK       | Experim.    | Broader |
| <b>Rowhani-Farid A et al.</b>       | 2020 | USA      | Experim.    | IPD     |
| <b>Siebert M et al.</b>             | 2020 | France   | Survey      | IPD     |
| <b>Mayer C et al.</b>               | 2019 | USA      | Survey      | IPD     |
| <b>Gaba JF et al.</b>               | 2020 | France   | Survey      | Broader |
| <b>Colombo C et al.</b>             | 2019 | Italy    | Survey      | IPD     |
| <b>Kochhar S et al.</b>             | 2019 | India    | Metrics     | IPD     |
| <b>Broes S et al.</b>               | 2020 | Belgium  | Qualitative | IPD     |
| <b>Rollando P et al.</b>            | 2020 | France   | Survey      | Broader |
| <b>Schmidt H et al.</b>             | 2018 | Germany  | Metrics     | IPD     |
| <b>Azar M et al.</b>                | 2020 | Canada   | Survey      | IPD     |
| <b>Almaqrami BS et al.</b>          | 2020 | China    | Survey      | IPD     |

|                               |      |             |         |         |
|-------------------------------|------|-------------|---------|---------|
| <b>Papageorgiou SN et al.</b> | 2019 | Switzerland | Survey  | iPD     |
| <b>Miller J et al.</b>        | 2019 | USA         | Survey  | Broader |
| <b>Lovato L et al.</b>        | 2018 | USA         | Metrics | IPD     |
| <b>Kemper JM et al.</b>       | 2020 | Australia   | Survey  | IPD     |
| <b>Johnson AL et al.</b>      | 2020 | USA         | Survey  | Broader |
| <b>Sherry C et al.</b>        | 2019 | USA         | Survey  | Broader |
| <b>Pellen C et al.</b>        | 2020 | France      | Survey  | Broader |
| <b>Danchev V et al.</b>       | 2020 | USA         | Survey  | IPD     |
| <b>Li R et al.</b>            | 2020 | USA         | Metrics | IPD     |

Broader: the definition is not solely restricted to IPD and can cover other type of additional material (e.g. protocol, code, etc).

**Supplementary material 4: Published studies about YODA and CSDR**

| <b>Reference</b>   | <b>Repository/<br/>platform</b> | <b>No. of trials included in<br/>repository/<br/>platform</b> | <b>No. of requests</b> | <b>No. of access to<br/>data</b> | <b>No. of publications</b> | <b>Date of assessment</b> |
|--------------------|---------------------------------|---------------------------------------------------------------|------------------------|----------------------------------|----------------------------|---------------------------|
| Ross, 2017         | YODA                            | 189                                                           | 73                     | 50                               | 2                          | 6/2017                    |
| Vaduganathan, 2018 | YODA                            | 537                                                           |                        | 30                               | 3                          | 5/2017                    |
| Strom, 2016        | CSDR                            | 237                                                           | 177                    | 144                              | 1*                         | 11/2015                   |

\*based upon an investigator survey with 24 responses

## Supplementary material 5: Published outputs from YODA (up to 1st July 2019) and CSDR (up to 31 August 2019)

| Published outputs      | Title                                                                                                                                                       | Platform used | Identification of the proposal | Type of study      | Request date |
|------------------------|-------------------------------------------------------------------------------------------------------------------------------------------------------------|---------------|--------------------------------|--------------------|--------------|
| Allott EH et al. 2017  | Statin Use, Serum Lipids, and Prostate Inflammation in Men with a Negative Prostate Biopsy: Results from the REDUCE Trial.                                  | CSDR          | 631                            | Secondary analysis | 29/10/2013   |
| Moreira DM et al. 2015 | Smoking Is Associated with Acute and Chronic Prostatic Inflammation: Results from the REDUCE Study.                                                         | CSDR          | 631                            | Secondary analysis | 29/10/2013   |
| Branche BL et al. 2017 | Sleep Problems are Associated with Development and Progression of Lower Urinary Tract Symptoms: Results from REDUCE.                                        | CSDR          | 631                            | Secondary analysis | 29/10/2013   |
| Vidal AC et al. 2016   | Racial differences in prostate inflammation: results from the REDUCE study.                                                                                 | CSDR          | 631                            | Secondary analysis | 29/10/2013   |
| Simon RM et al. 2016   | Does Prostate Size Predict the Development of Incident Lower Urinary Tract Symptoms in Men with Mild to No Current Symptoms? Results from the REDUCE Trial. | CSDR          | 631                            | Secondary analysis | 29/10/2013   |
| Simon RM et al. 2017   | Does Peak Urine Flow Rate Predict the Development of Incident Lower Urinary Tract Symptoms in Men with Mild to No Current Symptoms? Results from REDUCE.    | CSDR          | 631                            | Secondary analysis | 29/10/2013   |
| Moreira DM et al. 2015 | Chronic baseline prostate inflammation is associated with lower tumor volume in men with prostate cancer on repeat biopsy: Results from the REDUCE study.   | CSDR          | 631                            | Secondary analysis | 29/10/2013   |
| Kent DM et al. 2016    | Risk and treatment effect heterogeneity: re-analysis of individual participant data from 32 large clinical trials.                                          | CSDR          | 647                            | Methodological     | 29/10/2013   |
| Baay M et al. 2017     | Background rates of disease in Latin American children from a rotavirus vaccine study.                                                                      | CSDR          | 651                            | Secondary analysis | 11/03/2014   |
| Le Noury J et al. 2015 | Restoring Study 329: efficacy and harms of paroxetine and imipramine in treatment of major depression in adolescence.                                       | CSDR          | 669                            | Re-analysis        | 27/01/2014   |
| Nevitt SJ et al. 2017  | Exploring changes over time and characteristics associated with data retrieval across individual participant data meta-analyses: systematic review.         | CSDR          | 674                            | Methodological     | 15/05/2014   |
| Nevitt SJ et al. 2017  | Antiepileptic drug monotherapy for epilepsy: a network meta-analysis of individual participant data.                                                        | CSDR          | 674                            | Meta-analysis      | 15/05/2014   |

|                                     |                                                                                                                                                                                                          |      |      |                    |            |
|-------------------------------------|----------------------------------------------------------------------------------------------------------------------------------------------------------------------------------------------------------|------|------|--------------------|------------|
| <b>Forbess LJ et al. 2017</b>       | Failure of a systemic lupus erythematosus response index developed from clinical trial data: lessons examined and learned.                                                                               | CSDR | 911  | Secondary analysis | 25/07/2014 |
| <b>Dennis JM et al. 2018</b>        | Evaluating associations between the benefits and risks of drug therapy in type 2 diabetes: a joint modeling approach.                                                                                    | CSDR | 930  | Secondary analysis | missing    |
| <b>Dennis JM et al. 2018</b>        | Sex and BMI Alter the Benefits and Risks of Sulfonylureas and Thiazolidinediones in Type 2 Diabetes: A Framework for Evaluating Stratification Using Routine Clinical and Individual Trial Data.         | CSDR | 930  | Secondary analysis | missing    |
| <b>Serrano-Villar S et al. 2017</b> | Effects of Maraviroc versus Efavirenz in Combination with Zidovudine-Lamivudine on the CD4/CD8 Ratio in Treatment-Naive HIV-Infected Individuals.                                                        | CSDR | 945  | Secondary analysis | 23/04/2014 |
| <b>Mistry HB et al. 2017</b>        | Model based analysis of the heterogeneity in the tumour size dynamics differentiates vemurafenib, dabrafenib and trametinib in metastatic melanoma.                                                      | CSDR | 946  | Secondary analysis | 28/05/2014 |
| <b>Muff S et al. 2018</b>           | Bias away from the null due to miscounted outcomes? A case study on the TORCH trial.                                                                                                                     | CSDR | 977  | Re-analysis        | 12/05/2014 |
| <b>Fragoso CAV et al. 2018</b>      | Spirometric Criteria for Chronic Obstructive Pulmonary Disease in Clinical Trials of Pharmacotherapy.                                                                                                    | CSDR | 993  | Secondary analysis | 28/02/2017 |
| <b>Devilliers H et al. 2016</b>     | Minimal Clinically Important Differences for Generic Patient Reported Outcomes Tools in SLE                                                                                                              | CSDR | 998  | Secondary analysis | missing    |
| <b>Li-Kim-Moy J et al. 2018</b>     | Impact of Fever and Antipyretic Use on Influenza Vaccine Immune Responses in Children.                                                                                                                   | CSDR | 1000 | Secondary analysis | 08/09/2014 |
| <b>Blanco JR et al. 2017</b>        | Impact of dolutegravir and efavirenz on immune recovery markers: results from a randomized clinical trial.                                                                                               | CSDR | 1028 | Secondary analysis | 23/09/2014 |
| <b>Borges NA et al. 2016</b>        | Nonnucleoside Reverse-transcriptase Inhibitor- vs Ritonavir-boosted Protease Inhibitor-based Regimens for Initial Treatment of HIV Infection: A Systematic Review and Metaanalysis of Randomized Trials. | CSDR | 1058 | Meta-analysis      | 18/08/2014 |
| <b>Dodd S et al. 2018</b>           | Incidence and characteristics of the nocebo response from meta-analyses of the placebo arms of clinical trials of olanzapine for bipolar disorder.                                                       | CSDR | 1078 | Meta-analysis      | 09/10/2014 |
| <b>Serrano-Villar S et al. 2017</b> | Effects of Maraviroc versus Efavirenz in Combination with Zidovudine-Lamivudine on the CD4/CD8 Ratio in Treatment-Naive HIV-Infected Individuals.                                                        | CSDR | 1079 | Secondary analysis | 12/10/2014 |
| <b>Emamikia S et al. 2017</b>       | Relationship between glucocorticoid dose and adverse events in systemic lupus erythematosus: data from a randomized clinical trial.                                                                      | CSDR | 1084 | Secondary analysis | 20/02/2015 |



|                                       |                                                                                                                                                                                                                                      |      |      |                    |            |
|---------------------------------------|--------------------------------------------------------------------------------------------------------------------------------------------------------------------------------------------------------------------------------------|------|------|--------------------|------------|
| <b>Gruber JF et al. 2018</b>          | Timing and predictors of severe rotavirus gastroenteritis among unvaccinated infants in low- and middle-income countries.                                                                                                            | CSDR | 1088 | Secondary analysis | 04/09/2015 |
| <b>Gruber JF et al. 2018</b>          | Timing of Rotavirus Vaccine Doses and Severe Rotavirus Gastroenteritis Among Vaccinated Infants in Low- and Middle-income Countries.                                                                                                 | CSDR | 1088 | Secondary analysis | 04/09/2015 |
| <b>Schwartz LM et al. 2016</b>        | Rotavirus vaccine effectiveness in low-income settings: An evaluation of the test-negative design.                                                                                                                                   | CSDR | 1090 | Secondary analysis | 15/04/2015 |
| <b>Hilkens NA et al. 2016</b>         | Blood pressure levels and the risk of intracerebral hemorrhage after ischemic stroke.                                                                                                                                                | CSDR | 1100 | Secondary analysis | 13/01/2015 |
| <b>Hieronimus F et al. 2017</b>       | Efficacy of selective serotonin reuptake inhibitors in the absence of side effects: a mega-analysis of citalopram and paroxetine in adult depression.                                                                                | CSDR | 1103 | Meta-analysis      | missing    |
| <b>Waljee AK et al. 2018</b>          | Predicting corticosteroid-free endoscopic remission with vedolizumab in ulcerative colitis.                                                                                                                                          | CSDR | 1136 | Secondary analysis | 13/08/2015 |
| <b>Hadjichrysanthou C et al. 2016</b> | Understanding the within-host dynamics of influenza A virus: from theory to clinical implications.                                                                                                                                   | CSDR | 1137 | Secondary analysis | 16/04/2015 |
| <b>Voysey M et al. 2017</b>           | The Influence of Maternally Derived Antibody and Infant Age at Vaccination on Infant Vaccine Responses : An Individual Participant Meta-analysis.                                                                                    | CSDR | 1141 | Meta-analysis      | 22/07/2015 |
| <b>Radua J et al. 2017</b>            | Meta-Analysis of the Risk of Subsequent Mood Episodes in Bipolar Disorder.                                                                                                                                                           | CSDR | 1148 | Meta-analysis      | 30/01/2015 |
| <b>de Vries YA et al. 2018</b>        | Initial severity and antidepressant efficacy for anxiety disorders, obsessive-compulsive disorder, and posttraumatic stress disorder: An individual patient data meta-analysis.                                                      | CSDR | 1173 | Meta-analysis      | 30/06/2015 |
| <b>Zafack JG et al. 2019</b>          | Adverse events following immunisation with four-component meningococcal serogroup B vaccine (4CMenB): interaction with co-administration of routine infant vaccines and risk of recurrence in European randomised controlled trials. | CSDR | 1224 | Secondary analysis | missing    |
| <b>Sturm A et al. 2017</b>            | Evaluating the Hierarchical Structure of ADHD Symptoms and Invariance Across Age and Gender.                                                                                                                                         | CSDR | 1292 | Methodological     | 29/07/2015 |
| <b>Oon S et al. 2019</b>              | Lupus Low Disease Activity State (LLDAS) discriminates responders in the BLISS-52 and BLISS-76 phase III trials of belimumab in systemic lupus erythematosus.                                                                        | CSDR | 1320 | Secondary analysis | missing    |
| <b>Craig K et al. 2017</b>            | More of what works: Detection of informative sites during the conduct of clinical trials using machine learning                                                                                                                      | CSDR | 1323 | Methodological     | 21/10/2015 |

|                                              |                                                                                                                                                                                                    |      |      |                    |            |
|----------------------------------------------|----------------------------------------------------------------------------------------------------------------------------------------------------------------------------------------------------|------|------|--------------------|------------|
| <b>Bauza C et al. 2018</b>                   | Determining the Joint Effect of Obesity and Diabetes on All-Cause Mortality and Cardiovascular-Related Mortality following an Ischemic Stroke.                                                     | CSDR | 1331 | Secondary analysis | 28/01/2016 |
| <b>Bauza C et al. 2018</b>                   | Determining the joint effect of obesity and diabetes on functional disability at 3-months and on all-cause mortality at 1-year following an ischemic stroke.                                       | CSDR | 1331 | Secondary analysis | 28/01/2016 |
| <b>Tajgardoon M et al. 2018</b>              | A Novel Representation of Vaccine Efficacy Trial Datasets for Use in Computer Simulation of Vaccination Policy.                                                                                    | CSDR | 1374 | Secondary analysis | 25/05/2016 |
| <b>Berenguer J et al. 2019</b>               | Mathematical modeling of HIV-1 transmission risk from condomless anal intercourse in HIV-infected MSM by the type of initial ART.                                                                  | CSDR | 1403 | Secondary analysis | missing    |
| <b>Hilkens NA et al. 2017</b>                | Predicting Major Bleeding in Ischemic Stroke Patients With Atrial Fibrillation.                                                                                                                    | CSDR | 1455 | Secondary analysis | 03/06/2016 |
| <b>Kerr SJ et al. 2017</b>                   | The FDA snapshot algorithm may overestimate the efficacy of initial art                                                                                                                            | CSDR | 1456 | Methodological     | missing    |
| <b>Samara MT et al. 2017</b>                 | Initial symptom severity of bipolar I disorder and the efficacy of olanzapine: a meta-analysis of individual participant data from five placebo-controlled studies.                                | CSDR | 1457 | Meta-analysis      | 08/06/2016 |
| <b>Hopkins AM et al. 2018</b>                | Risk Factors for Severe Diarrhea with an Afatinib Treatment of Non-Small Cell Lung Cancer: A Pooled Analysis of Clinical Trials.                                                                   | CSDR | 1475 | Meta-analysis      | missing    |
| <b>Peters EM et al. 2018</b>                 | Melancholic Symptoms in Bipolar II Depression and Responsiveness to Lamotrigine in an Exploratory Pilot Study.                                                                                     | CSDR | 1569 | Secondary analysis | 01/11/2016 |
| <b>de Vries YA et al. 2018</b>               | Predicting antidepressant response by monitoring early improvement of individual symptoms of depression: individual patient data meta-analysis.                                                    | CSDR | 1575 | Meta-analysis      | 11/10/2016 |
| <b>Gemeinsamer<br/>Bundesausschuss, 2019</b> | Nutzenbewertungsverfahren zum Wirkstoff Sitagliptin                                                                                                                                                | CSDR | 1593 | Secondary analysis | 04/11/2016 |
| <b>Hopkins AM et al. 2019</b>                | Effect of early adverse events on response and survival outcomes of advanced melanoma patients treated with vemurafenib or vemurafenib plus cobimetinib: A pooled analysis of clinical trial data. | CSDR | 1599 | Meta-analysis      | missing    |
| <b>Carbon M et al. 2018</b>                  | Tardive dyskinesia risk with first- and second-generation antipsychotics in comparative randomized controlled trials: a meta-analysis.                                                             | CSDR | 1624 | Meta-analysis      | missing    |

|                                       |                                                                                                                                                                                                 |      |           |                    |            |
|---------------------------------------|-------------------------------------------------------------------------------------------------------------------------------------------------------------------------------------------------|------|-----------|--------------------|------------|
| <b>Schwarzman LS et al. 2018</b>      | The Association of Previous Prostate Biopsy Related Complications and the Type of Complication with Patient Compliance with Rebiopsy Scheme.                                                    | CSDR | 1626      | Secondary analysis | 16/12/2016 |
| <b>Voysey M et al. 2017</b>           | Prevalence and decay of maternal pneumococcal and meningococcal antibodies: A meta-analysis of type-specific decay rates.                                                                       | CSDR | 1629      | Meta-analysis      | 26/09/2016 |
| <b>Shapiro W et al. 2018</b>          | Salmeterol Combined with Fluticasone Reduces Exacerbations More Effectively in Chronic Bronchitis Associated with Chronic Obstructive Pulmonary Disease: A Post-hoc Analysis of the TORCH Trial | CSDR | 1640      | Secondary analysis | 28/02/2017 |
| <b>Parodis I et al. 2018</b>          | Clinical SLEDAI-2K zero may be a pragmatic outcome measure in SLE studies.                                                                                                                      | CSDR | 1695      | Secondary analysis | 21/09/2017 |
| <b>Parodis I et al. 2019</b>          | Established organ damage reduces belimumab efficacy in systemic lupus erythematosus.                                                                                                            | CSDR | 1695      | Secondary analysis | 21/09/2017 |
| <b>Parodis I et al. 2019</b>          | Predictors of low disease activity and clinical remission following belimumab treatment in systemic lupus erythematosus.                                                                        | CSDR | 1695      | Secondary analysis | 21/09/2017 |
| <b>Hernández-Breijo B et al. 2019</b> | Antimalarial agents diminish while methotrexate, azathioprine and mycophenolic acid increase BAFF levels in systemic lupus erythematosus.                                                       | CSDR | 1695      | Secondary analysis | 21/09/2017 |
| <b>Hopkins AM et al. 2019</b>         | Predictors of Long-Term Disease Control and Survival for HER2-Positive Advanced Breast Cancer Patients Treated With Pertuzumab, Trastuzumab, and Docetaxel.                                     | CSDR | 1741      | Secondary analysis | missing    |
| <b>Janciauskiene S et al. 2019</b>    | Serum Levels of Alpha1-antitrypsin and Their Relationship With COPD in the General Spanish Population.                                                                                          | CSDR | 2084      | Secondary analysis | missing    |
| <b>Storgaard H et al. 2016</b>        | Benefits and Harms of Sodium-Glucose Co-Transporter 2 Inhibitors in Patients with Type 2 Diabetes: A Systematic Review and Meta-Analysis.                                                       | YODA | 2014-0340 | Meta-analysis      | 19/11/2014 |
| <b>Christian KE et al. 2019</b>       | Gender Differences and Other Factors Associated with Weight Gain Following Initiation of Infliximab: A Post Hoc Analysis of Clinical Trials.                                                    | YODA | 2014-0334 | Meta-analysis      | 26/11/2014 |
| <b>Wang R et al. 2018</b>             | Comparative Efficacy of Tumor Necrosis Factor- $\alpha$ Inhibitors in Ankylosing Spondylitis: A Systematic Review and Bayesian Network Metaanalysis.                                            | YODA | 2014-0291 | Meta-analysis      | 08/12/2014 |
| <b>Waljee AK et al. 2017</b>          | External Validation of a Thiopurine Monitoring Algorithm on the SONIC Clinical Trial Dataset.                                                                                                   | YODA | 2014-0401 | Secondary analysis | 20/01/2015 |
| <b>Mospan GA et al. 2017</b>          | 5-Day versus 10-Day Course of Fluoroquinolones in Outpatient Males with a Urinary Tract Infection (UTI).                                                                                        | YODA | 2015-0514 | Secondary analysis | 26/05/2015 |

|                                       |                                                                                                                                                                                                 |      |           |                    |            |
|---------------------------------------|-------------------------------------------------------------------------------------------------------------------------------------------------------------------------------------------------|------|-----------|--------------------|------------|
| <b>Singh S et al. 2018</b>            | Impact of Obesity on Short- and Intermediate-Term Outcomes in Inflammatory Bowel Diseases: Pooled Analysis of Placebo Arms of Infliximab Clinical Trials.                                       | YODA | 2015-0612 | Meta-analysis      | 20/10/2015 |
| <b>Singh S et al. 2018</b>            | Obesity and Response to Infliximab in Patients with Inflammatory Bowel Diseases: Pooled Analysis of Individual Participant Data from Clinical Trials.                                           | YODA | 2015-0612 | Meta-analysis      | 20/10/2015 |
| <b>Spertus J et al. 2018</b>          | Risk of weight gain for specific antipsychotic drugs: a meta-analysis.                                                                                                                          | YODA | 2015-0678 | Meta-analysis      | 29/01/2016 |
| <b>Spertus J et al. 2019</b>          | Bayesian Meta-analysis of Multiple Continuous Treatments with Individual Participant-Level Data: An Application to Antipsychotic Drugs.                                                         | YODA | 2015-0678 | Meta-analysis      | 29/01/2016 |
| <b>Zou X et al. 2018</b>              | The role of PANSS symptoms and adverse events in explaining the effects of paliperidone on social functioning: a causal mediation analysis approach.                                            | YODA | 2016-0716 | Secondary analysis | 24/02/2016 |
| <b>World Health Organization 2017</b> | WHO report (appendix)                                                                                                                                                                           | YODA | 2016-0734 | Meta-analysis      | 24/02/2016 |
| <b>Mbuagbaw L et al. 2019</b>         | Outcomes of Bedaquiline Treatment in Patients with Multidrug-Resistant Tuberculosis.                                                                                                            | YODA | 2016-0734 | Meta-analysis      | 24/02/2016 |
| <b>Corbett M et al. 2017</b>          | Certolizumab pegol and secukinumab for treating active psoriatic arthritis following inadequate response to disease-modifying antirheumatic drugs: a systematic review and economic evaluation. | YODA | 2016-0897 | Meta-analysis      | 19/05/2016 |
| <b>Gay HC et al. 2017</b>             | Feasibility, Process, and Outcomes of Cardiovascular Clinical Trial Data Sharing: A Reproduction Analysis of the SMART-AF Trial.                                                                | YODA | 2016-0912 | Re-analysis        | 07/06/2016 |
| <b>Schneider-Thoma J et al. 2018</b>  | Second-generation antipsychotic drugs and short-term mortality: a systematic review and meta-analysis of placebo-controlled randomised controlled trials.                                       | YODA | 2016-0880 | Meta-analysis      | 17/06/2016 |
| <b>Schneider-Thoma J et al. 2019</b>  | Second-generation antipsychotic drugs and short-term somatic serious adverse events: a systematic review and meta-analysis.                                                                     | YODA | 2016-0880 | Meta-analysis      | 17/06/2016 |
| <b>Teply BA et al. 2019</b>           | Risk of development of visceral metastases subsequent to abiraterone vs placebo: An analysis of mode of radiographic progression in COU-AA-302.                                                 | YODA | 2016-1057 | Secondary analysis | 01/09/2016 |
| <b>Loubersac T et al. 2019</b>        | Neutrophil-to-lymphocyte Ratio as a Predictive Marker of Response to Abiraterone Acetate: A Retrospective Analysis of the COU302 Study.                                                         | YODA | 2016-1103 | Secondary analysis | 23/11/2016 |
| <b>Martin LJ et al. 2018</b>          | Identification of subgroups of metastatic castrate-resistant prostate cancer (mCRPC) patients treated with abiraterone                                                                          | YODA | 2016-1122 | Secondary analysis | 23/11/2016 |

|                              |                                                                                                                                                                                      |      |           |                    |            |
|------------------------------|--------------------------------------------------------------------------------------------------------------------------------------------------------------------------------------|------|-----------|--------------------|------------|
|                              | plus prednisone at low- vs. high-risk of radiographic progression: An analysis of COU-AA-302.                                                                                        |      |           |                    |            |
| <b>Waljee AK et al. 2019</b> | Development and Validation of Machine Learning Models in Prediction of Remission in Patients With Moderate to Severe Crohn Disease.                                                  | YODA | 2016-1176 | Secondary analysis | 01/03/2017 |
| <b>Kubo K et al. 2018</b>    | Placebo effects in adult and adolescent patients with schizophrenia: combined analysis of nine RCTs.                                                                                 | YODA | 2017-1676 | Meta-analysis      | 24/05/2017 |
| <b>Kumagai F et al. 2018</b> | Early Placebo Improvement Is a Marker for Subsequent Placebo Response in Long-Acting Injectable Antipsychotic Trials for Schizophrenia: Combined Analysis of 4 RCTs.                 | YODA | 2017-1701 | Meta-analysis      | 01/06/2017 |
| <b>Yiu ZZN et al. 2019</b>   | A standardization approach to compare treatment safety and effectiveness outcomes between clinical trials and real-world populations in psoriasis.                                   | YODA | 2017-1706 | Methodological     | 08/08/2017 |
| <b>Narula N et al. 2018</b>  | Patient-Reported Outcomes and Endoscopic Appearance of Ulcerative Colitis: A Systematic Review and Meta-analysis.                                                                    | YODA | 2017-2031 | Meta-analysis      | 30/08/2017 |
| <b>Singh S et al. 2018</b>   | No Benefit of Concomitant 5-Aminosalicylates in Patients With Ulcerative Colitis Escalated to Biologic Therapy: Pooled Analysis of Individual Participant Data From Clinical Trials. | YODA | 2017-2306 | Meta-analysis      | 25/09/2017 |
| <b>Singh S et al. 2019</b>   | Efficacy and Speed of Induction of Remission of Infliximab vs Golimumab for Patients With Ulcerative Colitis, Based on Data From Clinical Trials.                                    | YODA | 2018-3121 | Meta-analysis      | 21/05/2018 |
